# Supplementary material for: Bacterial community associated with worker honeybees (Apis mellifera) affected by European foulbrood
Source: PeerJ. 2017 Sep 25;5:e3816. doi: 10.7717/peerj.3816 (PMC5619233; doi:10.7717/peerj.3816)
Supplement: Supplemental Information 1 [file peerj-05-3816-s001.xls]

## Sheet: Table S1 - List of samples
Table S1 List of apiaries, colonies and samples examined in this study. The barcodes, biosamples and bioproject accession numbers are included. The sequences were deposited in GenBank under Sequence Read Archive (SRA) project No. SRP093440. The EFB factors were as follows: 0 – control bees outside of the EFB zone without signs of EFB; 1 (in green) – bees from an EFB apiary, but from colonies with…
Sample Name	Apiary-site	N	E	Bee colony No.	Sampling date	EFB factor	EFB/PCR	Barcode	Biosample	Bioproject	Reference	Seq. Gr.
KY59	Kyvalka	49°11′24″	16°26′57″	12	2014-09-14	0	0	CGTGATAA	SAMN04299293	PRJNA304944	Hubert et al. (2016)	a
PS2A	Pec pod Snezkou	50°41′53″	15°44′13″	2	2015-07-24	2	1	CGTAACCA	SAMN05992001	PRJNA352995	this study	c
PS2B	Pec pod Snezkou	50°41′53″	15°44′13″	2	2015-07-24	2	1	CGTAACCA	SAMN05992002	PRJNA352995	this study	c
PS2C	Pec pod Snezkou	50°41′53″	15°44′13″	2	2015-07-24	2	1	CGTAAGAA	SAMN05992003	PRJNA352995	this study	c
PS3A	Pec pod Snezkou	50°41′53″	15°44′13″	3	2015-07-24	2	1	CGTACCCA	SAMN05992004	PRJNA352995	this study	c
PS3B	Pec pod Snezkou	50°41′53″	15°44′13″	3	2015-07-24	2	1	CGTAGATA	SAMN05992005	PRJNA352995	this study	c
PS3C	Pec pod Snezkou	50°41′53″	15°44′13″	3	2015-07-24	2	1	CGTAGGCT	SAMN05992006	PRJNA352995	this study	c
PS4A	Pec pod Snezkou	50°41′53″	15°44′13″	4	2015-07-24	2	1	CGTAAGAA	SAMN05992007	PRJNA352995	this study	c
PS4B	Pec pod Snezkou	50°41′53″	15°44′13″	4	2015-07-24	2	1	CGTATTCA	SAMN05992008	PRJNA352995	this study	c
PS4C	Pec pod Snezkou	50°41′53″	15°44′13″	4	2015-07-24	2	1	CGTATTTC	SAMN05992009	PRJNA352995	this study	c
PS5A	Pec pod Snezkou	50°41′53″	15°44′13″	5	2015-07-24	2	1	CGTACCCA	SAMN05992010	PRJNA352995	this study	c
PS5B	Pec pod Snezkou	50°41′53″	15°44′13″	5	2015-07-24	2	1	CGTCAAGA	SAMN05992011	PRJNA352995	this study	c
PS5C	Pec pod Snezkou	50°41′53″	15°44′13″	5	2015-07-24	2	1	CGTCACAG	SAMN05992012	PRJNA352995	this study	c
PR3A	Horni Marsov	50°39′23″	15°48′9″	1	2015-08-04	2	1	CGTAGATA	SAMN05991980	PRJNA352995	this study	c
PR3B	Horni Marsov	50°39′23″	15°48′9″	1	2015-08-04	2	1	CGTCCAGG	SAMN05991981	PRJNA352995	this study	c
PR3C	Horni Marsov	50°39′23″	15°48′9″	1	2015-08-04	2	1	CGTCGCAT	SAMN05991982	PRJNA352995	this study	c
PR4A	Horni Marsov	50°39′23″	15°48′9″	6	2015-08-04	2	1	CGTATTCA	SAMN05991984	PRJNA352995	this study	c
PR4B	Horni Marsov	50°39′23″	15°48′9″	6	2015-08-04	2	1	CGTCTGAA	SAMN05991985	PRJNA352995	this study	c
PR4C	Horni Marsov	50°39′23″	15°48′9″	6	2015-08-04	2	1	CGTGAGAC	SAMN05991986	PRJNA352995	this study	c
PR5A	Horni Marsov	50°39′23″	15°48′9″	7	2015-08-04	1	0	CGTGATAA	SAMN05991987	PRJNA352995	this study	c
PR5B	Horni Marsov	50°39′23″	15°48′9″	7	2015-08-04	1	0	CGTGGGAC	SAMN05991988	PRJNA352995	this study	c
PR5C	Horni Marsov	50°39′23″	15°48′9″	7	2015-08-04	1	0	CGTATTTC	SAMN05991989	PRJNA352995	this study	c
PR6A	Horni Marsov	50°39′23″	15°48′9″	8	2015-08-04	2	1	CGTCACAG	SAMN05991991	PRJNA352995	this study	c
PR6B	Horni Marsov	50°39′23″	15°48′9″	8	2015-08-04	2	1	CGTGGTCA	SAMN05991992	PRJNA352995	this study	c
PR6C	Horni Marsov	50°39′23″	15°48′9″	8	2015-08-04	2	1	CGTTCACG	SAMN05991993	PRJNA352995	this study	c
PR8A	Horni Marsov	50°39′23″	15°48′9″	9	2015-08-04	2	1	CGTTTACT	SAMN05991996	PRJNA352995	this study	c
PR8B	Horni Marsov	50°39′23″	15°48′9″	9	2015-08-04	2	1	CGTTTCTA	SAMN05991997	PRJNA352995	this study	c
PR8C	Horni Marsov	50°39′23″	15°48′9″	9	2015-08-04	2	1	CGTCTGAA	SAMN05991998	PRJNA352995	this study	c
PR11A	Horni Marsov	50°39′23″	15°48′9″	10	2015-08-04	1	0	CTAACACA	SAMN05991977	PRJNA352995	this study	c
PR11B	Horni Marsov	50°39′23″	15°48′9″	10	2015-08-04	1	0	CTAACAGC	SAMN05991978	PRJNA352995	this study	c
PR11C	Horni Marsov	50°39′23″	15°48′9″	10	2015-08-04	1	0	CTAAGAAC	SAMN05991979	PRJNA352995	this study	c
PC4A	Cerny Dul-Cista	50°37′8″	15°42′33″	11	2015-08-04	0	0	CGTGGGAC	SAMN05991976	PRJNA352995	this study	c
PO12	Postrizin	50°13′59″	14°23′12″	13	2014-10-29	0	0	CGTGGTCA	SAMN05292189	PRJNA326764	Hubert et al. (2017)	b
PO1	Postrizin	50°13′59″	14°23′12″	14	2014-10-29	0	0	CGTCAAGA	SAMN04299295	PRJNA304944	Hubert et al. (2016)	a
PO2	Postrizin	50°13′59″	14°23′12″	15	2014-10-29	0	0	CGTCACAG	SAMN04299376	PRJNA304944	Hubert et al. (2016)	a
PO3	Postrizin	50°13′59″	14°23′12″	16	2014-10-29	0	0	CGTCCAGG	SAMN04299378	PRJNA304944	Hubert et al. (2016)	a
PO4	Postrizin	50°13′59″	14°23′12″	17	2014-10-29	0	0	CGTCGCAT	SAMN04299380	PRJNA304944	Hubert et al. (2016)	a
PE11	Prelovice	50°4′22″	15°36′54″	18	2014-09-14	0	0	CGTGAGAC	SAMN05292190	PRJNA326764	Hubert et al. (2017)	b
PE18	Prelovice	50°4′22″	15°36′54″	19	2014-09-14	0	0	CGTGATAA	SAMN05292191	PRJNA326764	Hubert et al. (2017)	b
PE19	Prelovice	50°4′22″	15°36′54″	20	2014-09-14	0	0	CGTGAGAC	SAMN05292192	PRJNA326764	Hubert et al. (2017)	a
PE1	Prelovice	50°4′22″	15°36′54″	21	2014-09-14	0	0	CGTGAGAC	SAMN05292190	PRJNA326764	Hubert et al. (2017)	b
PE20	Prelovice	50°4′22″	15°36′54″	22	2014-09-14	0	0	CGTGGGAC	SAMN05292193	PRJNA326764	Hubert et al. (2017)	b
PE2	Prelovice	50°4′22″	15°36′54″	23	2014-09-14	0	0	CGTCGCAT	SAMN04299384	PRJNA304944	Hubert et al. (2016)	b
PE4	Prelovice	50°4′22″	15°36′54″	24	2014-09-14	0	0	CGTCTGAA	SAMN05292310	PRJNA326764	Hubert et al. (2017)	b
SKA	Stoky-Skrivanek	49°30′9″	15°35′19″	25	2014-07-09	0	0	CTCGTGAT	SAMN05992013	PRJNA352995	this study	c
SKB	Stoky-Skrivanek	49°30′9″	15°35′19″	25	2014-07-09	0	0	CGTAGGCT	SAMN04299502	PRJNA304944	Hubert et al. (2016)	b
SKC	Stoky-Skrivanek	49°30′9″	15°35′19″	25	2014-07-09	0	0	CTCTAGCG	SAMN05992014	PRJNA352995	this study	c
ST17	Strelec	50°29′3″	15°15′14″	26	2014-10-02	0	0	CGTGGGAC	SAMN05292316	PRJNA326764	Hubert et al. (2017)	a
ST18	Strelec	50°29′3″	15°15′14″	27	2014-10-02	0	0	CGTTTACT	SAMN05292317	PRJNA326764	Hubert et al. (2017)	b

## Sheet: Table S2 - raw dataset
Table S2 Identified 16S rRNA sequences of the V1-V3 region using the Illumina MiSeq platform and their relative numbers (%) in the standardized subsample dataset. The OTUs were identified according to the Ribosomal Database Project and through comparison of the sequences with those in GenBank.
													EFB factor	0	0	0	0	0	0	0	0	0	0	0	0	0	0	0	0	0	0	0	1	1	1	1	1	2	2	2	2	2	2	2	2	2	2	2	2
													Sample	KY59	PC4A	PE1	PE11	PE18	PE19	PE2	PE20	PE4	PO1	PO12	PO2	PO3	PO4	SKA	SKB	SKC	ST17	ST18	PR11A	PR11B	PR11C	PR5A	PR5B	PR3A	PR3B	PR3C	PR4A	PR4B	PR4C	PR5C	PR6A	PR6B	PR6C	PR8A	PR8B
	RDP -identification										Genbank Indetification
OTU97	Phyllum	ct	Class	ct	Order	ct	Family	ct	Genus	ct	Taxon	Identity %	Acess. No.
OTU1	Firmicutes	0.9995	Bacilli	0.995	Lactobacillales	0.9599	Lactobacillaceae	0.9233	Lactobacillus	0.8797	Lactobacillus apis	99	NR_125702	8672	2151	1092	3551	4317	900	4351	5557	988	3164	3599	3787	3656	1407	240	2098	1976	4838	2606	4023	2616	2693	3072	2838	2135	2262	2068	1377	3910	2991	1360	1589	1028	3138	3652	1405
OTU10	Firmicutes	0.9996	Bacilli	0.9971	Lactobacillales	0.9895	Enterococcaceae	0.9861	Enterococcus	0.9818	Enterococcus faecalis	99	NR_113901	19	1	30	38	27	34	13	43	16	35	32	53	49	44	13	7	3	41	17	3	5	4	10	5	48	72	13	5	4	7	4	4	11	5	8	19
OTU101	Proteobacteria	0.9996	Betaproteobacteria	0.9961	Burkholderiales	0.987	Burkholderiaceae	0.9854	Ralstonia	0.9132	Ralstonia pickettii	99	NR_102967	0	0	0	0	0	0	0	0	0	0	2	0	0	0	0	0	0	0	0	0	0	0	0	0	0	0	0	0	0	0	0	0	0	0	0	0
OTU103	Proteobacteria	0.9999	Gammaproteobacteria	0.9956	Pasteurellales	0.9813	Pasteurellaceae	0.9847	Haemophilus	0.7119	Haemophilus aegyptius	98	NR_042875	0	0	0	0	0	0	0	0	0	0	0	0	0	0	0	0	0	0	0	0	0	0	0	0	0	0	0	0	0	0	0	0	0	0	0	0
OTU104	Proteobacteria	0.9994	Alphaproteobacteria	0.9652	Rhizobiales	0.7373	Bartonellaceae	0.3482	Bartonella	0.0897	Bartonella rattimassiliensis	95	NR_115255	0	0	1	0	1	1	4	0	1	3	3	1	0	4	0	0	1	1	3	0	0	0	0	2	0	0	0	0	0	0	0	3	2	1	0	0
OTU105	Proteobacteria	0.9995	Gammaproteobacteria	0.997	Orbales	0.9063	Orbaceae	0.8851	Orbus	0.2785	Gilliamella apicola	95	NR_118433	0	1	0	0	0	0	0	0	0	0	0	0	0	0	0	0	0	0	0	1	0	5	0	0	0	0	3	0	6	0	0	0	0	0	0	0
OTU106	Proteobacteria	1	Gammaproteobacteria	0.9992	Enterobacteriales	0.9832	Enterobacteriaceae	0.9854	Leclercia	0.6783	Enterobacter cloacae	99	NR_102794	1	8	0	3	0	1	0	0	9	5	8	0	0	44	0	1	0	7	20	0	55	5	7	1	40	0	1	2	0	2	0	0	0	0	0	0
OTU107	Bacteroidetes	0.9993	Bacteroidia	0.9519	Bacteroidales	0.842	Prevotellaceae	0.4269	Prevotella	0.1257	Prevotella brevis	89	NR_041954	0	0	0	0	0	0	0	0	0	0	0	0	0	0	0	0	0	0	0	0	0	0	0	0	0	0	0	0	0	0	0	0	0	0	0	0
OTU108	Bacteroidetes	0.9993	Bacteroidia	0.9595	Bacteroidales	0.8634	Prevotellaceae	0.4269	Prevotella	0.0897	Prevotella marshii	89	NR_113111	0	0	0	0	0	0	0	0	0	0	0	0	0	0	0	0	0	0	0	0	0	0	0	0	0	0	0	0	0	0	0	0	0	0	0	0
OTU109	Firmicutes	1	Bacilli	0.9988	Lactobacillales	0.9895	Lactobacillaceae	0.9889	Lactobacillus	0.9954	Lactobacillus kimbladii	99	NR_126250	39	115	17	16	27	6	30	32	15	35	17	39	76	18	132	136	111	16	12	106	141	122	70	28	61	35	63	63	45	73	52	29	24	55	73	80
OTU11	Firmicutes	0.9699	Clostridia	0.7708	Clostridiales	0.3962	Natranaerovirga	0.0173	non determined	non determined	Natranaerovirga hydrolytica	86	NR_108630	4	19	4	4	2	0	2	0	3	2	2	1	1	0	0	3	6	0	2	0	1	2	4	1	7	0	0	18	0	5	4	11	0	0	0	1
OTU112	Bacteroidetes	1	Bacteroidia	0.9976	Bacteroidales	0.9942	Prevotellaceae	0.9917	Prevotella	0.9954	Prevotella bryantii	99	NR_028866	0	0	0	0	0	0	0	0	0	0	0	0	0	0	0	0	0	0	0	0	0	0	0	0	0	0	0	0	0	0	0	0	0	0	0	0
OTU113	Bacteroidetes	0.9993	Bacteroidia	0.9652	Bacteroidales	0.8849	Prevotellaceae	0.5046	Prevotella	0.2276	Prevotella salivae	89	NR_024816	0	0	0	0	0	0	0	0	0	0	0	0	0	0	0	0	0	0	0	0	0	0	0	0	0	0	0	0	0	0	0	0	0	0	0	0
OTU114	Firmicutes	0.9789	Clostridia	0.8387	Clostridiales	0.4388	Ruminococcaceae	0.1908	Oscillibacter	0.0173	Saccharofermentans acetigenes	88	NR_115340	0	0	0	0	0	0	0	0	0	0	0	0	0	0	0	0	0	0	0	0	0	0	0	0	0	0	0	0	0	0	0	0	0	0	0	0
OTU116	Firmicutes	1	Bacilli	0.999	Bacillales	0.9899	Staphylococcaceae	0.9861	Staphylococcus	0.986	Staphylococcus hominis	99	NR_036956	0	0	0	1	2	2	1	0	1	1	2	1	0	0	2	0	0	0	8	0	0	0	0	0	0	0	0	0	0	0	0	0	0	0	0	0
OTU117	Proteobacteria	1	Gammaproteobacteria	0.9973	Orbales	0.9895	Orbaceae	0.9889	Orbus	0.9777	Orbus hercynius	99	NR_116759	0	0	0	0	0	0	0	1	0	0	3	0	0	0	0	0	0	0	0	0	0	0	0	0	0	1	0	0	0	0	1	1	0	0	0	0
OTU12	Firmicutes	1	Bacilli	0.9989	Lactobacillales	0.989	Lactobacillaceae	0.9882	Lactobacillus	0.9944	Lactobacillus kullabergensis	99	NR_126251	930	601	441	421	528	456	156	152	253	761	248	655	1164	457	471	711	812	383	57	865	1026	731	728	966	610	439	827	418	662	1205	629	439	354	584	520	562
OTU120	Bacteroidetes	0.9994	Bacteroidia	0.987	Bacteroidales	0.9662	Prevotellaceae	0.853	Prevotella	0.6783	Prevotella ruminicola	95	NR_044632	0	0	0	0	0	0	0	0	0	0	0	0	0	0	0	0	0	0	0	0	0	0	0	0	0	0	0	0	0	0	0	0	0	0	0	0
OTU13	Firmicutes	0.9995	Bacilli	0.997	Lactobacillales	0.9912	Lactobacillaceae	0.991	Lactobacillus	0.9954	Lactobacillus mellifer	99	NR_126248	19	527	135	53	124	150	119	197	158	250	124	330	137	192	239	300	633	113	238	287	163	55	159	148	248	31	135	351	220	264	244	154	110	127	61	84
OTU14	Actinobacteria	1	Actinobacteria	0.9985	Bifidobacteriales	0.9813	Bifidobacteriaceae	0.9847	Bifidobacterium	0.9693	Bifidobacterium asteroides	99	NR_102860	42	827	267	94	330	31	170	149	15	571	210	882	749	354	112	946	864	111	116	462	379	354	806	824	1003	400	433	941	388	123	2036	634	239	445	364	457
OTU15	Proteobacteria	0.9994	Alphaproteobacteria	0.9595	Rhodospirillales	0.8634	Acetobacteraceae	0.7368	Acetobacter	0.0897	Commensalibacter intestini	95	NR_116307	4	29	117	244	122	83	75	47	394	74	89	119	62	201	4937	266	315	52	104	13	21	1	73	124	204	60	61	48	10	27	101	185	245	170	32	59
OTU16	Proteobacteria	0.9998	Gammaproteobacteria	0.9952	Orbales	0.9599	Orbaceae	0.9233	Gilliamella	0.6112	Gilliamella apicola	97	NR_121727	2	6	26	16	27	2000	20	3286	460	17	7	958	9	7	16	149	4	9	7	17	1	1	0	11	12	1	14	23	4	3	5	2	3	3	23	5
OTU17	Actinobacteria	0.9995	Actinobacteria	0.9968	Bifidobacteriales	0.987	Bifidobacteriaceae	0.9868	Bifidobacterium	0.9735	Bifidobacterium coryneforme	99	NR_044690	15	281	85	47	38	23	101	43	4	122	136	109	358	142	73	356	496	142	509	106	71	42	72	114	758	137	107	372	191	40	152	105	70	97	78	82
OTU18	Proteobacteria	1	Gammaproteobacteria	0.9971	Orbales	0.9895	Orbaceae	0.9889	Frischella	0.9777	Frischella perrara	99	NR_118490	149	694	891	1454	1772	1842	833	224	1276	333	312	175	920	214	2957	559	426	325	750	293	175	333	194	171	395	236	138	360	250	230	146	259	388	153	70	520
OTU19	Proteobacteria	0.9993	Alphaproteobacteria	0.9481	Rhodospirillales	0.8226	Acetobacteraceae	0.6207	Gluconobacter	0.068	Swingsia samuiensis	94	NR_132672	35	9	152	112	159	14	5	3	9	6	48	2	0	10	28	7	300	59	310	0	1	1	39	21	149	18	30	10	0	4	27	77	8	6	63	49
OTU2	Proteobacteria	0.9995	Alphaproteobacteria	0.9797	Rhizobiales	0.8527	Phyllobacteriaceae	0.4659	Phyllobacterium	0.2276	Bartonella bacilliformis	96	NR_074203	25	34	4016	70	2468	2797	1961	2616	2253	4065	4497	4529	499	5670	2507	86	858	5212	5481	186	75	67	691	2139	572	634	1568	92	63	27	2188	5491	5982	2200	1397	613
OTU21	Bacteroidetes	0.9993	Bacteroidia	0.97	Bacteroidales	0.9063	Porphyromonadaceae	0.8142	Dysgonomonas	0.4823	Dysgonomonas capnocytophagoides	92	NR_113133	1	0	1	5	2	0	1	0	663	0	5	0	248	38	1	0	55	130	1233	81	35	0	65	149	68	1	66	1	0	72	246	43	1	2	1	0
OTU22	Tenericutes	1	Mollicutes	0.9994	Entomoplasmatales	0.9987	Spiroplasmataceae	0.9875	Spiroplasma	0.9923	Spiroplasma melliferum	99	NR_025756	28	0	28	0	0	26	1	0	0	42	0	52	40	38	134	383	135	36	0	0	0	0	0	0	0	0	0	0	0	0	0	1	1	0	0	0
OTU23	Bacteroidetes	0.9968	Flavobacteriia	0.5672	Flavobacteriales	0.291	Flavobacteriaceae	0.1308	Ornithobacterium	0.0148	Ornithobacterium rhinotracheale	84	NR_102940	8	122	199	10	41	153	41	1	279	7	6	0	4	18	34	376	124	2	0	17	108	52	33	30	71	13	4	108	4	7	73	6	0	13	2	3
OTU24	Proteobacteria	0.9992	Gammaproteobacteria	0.9254	Pseudomonadales	0.326	Pseudomonadaceae	0.1514	Azotobacter	0.0354	Azotobacter chroococcum	88	NR_114167	0	0	14	1	0	8	0	14	1	533	343	7	1	691	0	0	0	64	21	0	0	0	0	0	0	0	0	0	0	0	0	1	0	0	0	0
OTU25	Firmicutes	0.9998	Bacilli	0.9979	Lactobacillales	0.9738	Lactobacillaceae	0.9691	Lactobacillus	0.9756	Lactobacillus melliventris	97	NR_126252	120	123	140	269	73	36	91	115	143	250	123	367	246	270	71	160	188	63	64	508	339	206	395	492	247	89	141	375	88	205	301	294	261	339	268	295
OTU26	Proteobacteria	0.9997	Gammaproteobacteria	0.9943	Enterobacteriales	0.917	Enterobacteriaceae	0.8928	Morganella	0.6112	Morganella morganii	96	NR_102517	21	0	593	1	171	51	2	8	825	61	0	38	43	50	0	0	0	64	2	0	0	0	0	0	0	0	0	0	0	0	0	0	0	0	0	0
OTU28	Proteobacteria	0.9991	Gammaproteobacteria	0.7029	Oceanospirillales	0.2209	Hahellaceae	0.1006	Zooshikella	0.0173	Pseudomonas indica	88	NR_114196	0	19	87	3	2	2	1	2	497	3	192	11	1	7	11	7	4	2	1156	0	0	3	4	0	0	0	19	0	0	0	2	96	1	9	0	0
OTU29	Proteobacteria	0.9993	Alphaproteobacteria	0.9943	Rhodospirillales	0.9719	Acetobacteraceae	0.9615	Saccharibacter	0.6448	Parasaccharibacter apium	99	NR_133042	5	0	7	3	1	10	2	10	5	14	16	9	6	4	4	0	1	6	25	2	1	2	2	3	7	1	0	1	2	2	1	1	1	0	0	2
OTU3	Proteobacteria	0.9995	Gammaproteobacteria	0.9969	Orbales	0.9851	Orbaceae	0.9861	Gilliamella	0.9735	Gilliamella apicola	99	NR_118433	5416	4589	3080	8058	3861	4691	6080	2852	4856	2929	3927	956	2764	2502	3325	3909	2592	1754	1609	2934	3278	5492	3734	2491	2547	3450	3586	4445	7246	7136	2244	3380	3133	4225	5805	6214
OTU30	Firmicutes	0.9431	Bacilli	0.6351	Lactobacillales	0.256	Lactobacillaceae	0.1157	Lactobacillus	0.0173	Lactobacillus crispatus	85	NR_119274	1	0	61	0	24	43	5	24	81	36	20	106	12	91	9	16	109	19	71	0	2	1	5	8	37	1	2	28	2	1	10	7	5	5	1	2
OTU31	Proteobacteria	0.9994	Alphaproteobacteria	0.9595	Rhizobiales	0.6947	Bartonellaceae	0.4269	Bartonella	0.1766	Bartonella queenslandensis	95	NR_116176	0	0	0	0	0	0	0	0	0	0	0	0	0	0	0	1	0	0	0	0	0	0	0	0	1	0	0	1	0	0	0	1	0	0	0	0
OTU32	Proteobacteria	1	Gammaproteobacteria	0.9992	Enterobacteriales	0.9832	Enterobacteriaceae	0.9854	Hafnia	0.6448	Hafnia alvei	99	NR_112985	0	0	0	25	7	7	1	25	8	34	9	4	0	108	0	4	2	31	29	29	59	7	8	4	24	8	35	8	30	5	8	0	195	17	14	4
OTU33	Actinobacteria	0.9997	Actinobacteria	0.9976	Bifidobacteriales	0.9681	Bifidobacteriaceae	0.9462	Bifidobacterium	0.7119	Bifidobacterium asteroides	98	NR_102860	58	750	197	79	89	55	243	169	24	426	242	549	696	353	84	1029	1587	120	186	677	305	286	384	438	797	250	276	700	310	63	630	335	140	304	253	214
OTU34	Proteobacteria	1	Gammaproteobacteria	0.9961	Enterobacteriales	0.9775	Enterobacteriaceae	0.9833	Arsenophonus	0.9132	Arsenophonus nasoniae	98	NR_042811	10	0	32	0	2	35	0	0	0	27	0	20	38	24	0	0	0	38	0	0	0	0	0	0	0	0	0	0	0	0	0	0	0	0	0	0
OTU35	Firmicutes	1	Bacilli	0.999	Lactobacillales	0.9979	Leuconostocaceae	0.9977	Fructobacillus	0.9777	Fructobacillus tropaeoli	99	NR_113043	0	0	0	0	0	0	1	0	0	2	0	0	0	1	5	3	3	0	2	0	0	0	2	0	103	47	3	2	0	1	0	0	0	0	0	1
OTU36	Actinobacteria	0.9999	Actinobacteria	0.9982	Actinomycetales	0.9832	Brevibacteriaceae	0.9233	Brevibacterium	0.8797	Brevibacterium siliguriense	98	NR_115086	0	0	0	0	0	0	0	0	1	0	0	0	0	0	0	0	0	0	0	0	0	0	0	0	0	0	0	1	0	0	0	0	0	0	0	0
OTU37	Proteobacteria	0.9997	Gammaproteobacteria	0.9952	Orbales	0.9385	Orbaceae	0.908	Gilliamella	0.3804	Gilliamella apicola	96	NR_118433	1	0	3	2	0	0	0	0	20	1	0	0	0	0	0	2	1	0	0	12	6	8	33	14	2	5	11	5	11	34	9	83	0	2	1	12
OTU38	Proteobacteria	1	Gammaproteobacteria	0.9989	Enterobacteriales	0.9757	Enterobacteriaceae	0.9768	Serratia	0.7454	Serratia proteamaculans	99	NR_074820	0	0	0	0	0	0	0	2	0	5	1	2	4	345	1	0	0	10	0	1	1	0	2	2	2	0	1	1	0	0	1	0	0	1	0	1
OTU39	Proteobacteria	1	Gammaproteobacteria	0.9994	Enterobacteriales	0.9886	Enterobacteriaceae	0.9875	Tatumella	0.9468	Tatumella ptyseos	99	NR_116283	0	0	0	87	1	11	96	5	3	2	110	0	0	28	1	0	0	225	88	0	0	0	0	0	5	0	0	0	0	0	1	0	0	0	0	0
OTU4	Firmicutes	0.9993	Bacilli	0.987	Lactobacillales	0.917	Enterococcaceae	0.8928	Melissococcus	0.4823	Melissococcus plutonius	99	NR_074098	0	15	0	0	0	0	0	0	0	0	0	0	0	0	0	14	13	0	0	12	3	8	8	5	707	2018	1229	913	14	38	13	47	257	168	27	37
OTU40	Proteobacteria	1	Gammaproteobacteria	0.9996	Enterobacteriales	0.9895	Enterobacteriaceae	0.9889	Klebsiella	0.8797	Klebsiella oxytoca	99	NR_113341	0	1	0	6	1	0	0	1	25	9	6	1	0	72	0	0	2	23	22	0	14	1	2	0	134	0	27	0	0	0	0	0	1	0	0	0
OTU41	Proteobacteria	0.9993	Gammaproteobacteria	0.995	Orbales	0.9278	Orbaceae	0.9004	Gilliamella	0.5332	Gilliamella apicola	94	NR_118433	0	1	9	0	0	0	1	0	0	0	0	0	0	0	0	0	0	0	0	0	0	3	2	0	1	0	1	1	3	0	1	0	0	0	0	0
OTU42	Proteobacteria	0.9991	Gammaproteobacteria	0.9065	Legionellales	0.3962	Coxiellaceae	0.2301	Diplorickettsia	0.0571	Diplorickettsia massiliensis	90	NR_117407	0	0	0	0	0	0	0	0	0	0	0	0	0	0	0	0	0	0	0	0	0	1	0	0	0	0	1	0	0	0	0	0	0	1	0	1
OTU43	Actinobacteria	0.9997	Actinobacteria	0.9975	Actinomycetales	0.9907	Propionibacteriaceae	0.9889	Propionibacterium	0.9954	Propionibacterium acnes	98	NR_07467	0	0	0	0	2	1	0	2	2	2	0	3	0	1	2	1	0	1	17	0	0	0	0	0	0	0	0	0	0	0	0	0	0	0	0	0
OTU44	Proteobacteria	0.9993	Gammaproteobacteria	0.9919	Orbales	0.917	Orbaceae	0.8928	Gilliamella	0.3294	Gilliamella apicola	95	NR_118433	0	0	0	11	1	0	0	0	0	0	1	0	0	0	0	0	0	0	0	1	6	4	54	2	0	0	0	1	0	1	0	1	0	0	12	1
OTU45	Firmicutes	0.9994	Bacilli	0.9966	Lactobacillales	0.9899	Streptococcaceae	0.9875	Streptococcus	0.9923	Streptococcus mitis	99	NR_102808	0	0	1	0	1	0	0	1	0	0	0	0	0	1	0	0	0	0	0	0	0	0	0	0	0	0	0	0	0	0	0	0	0	0	0	0
OTU47	Proteobacteria	1	Gammaproteobacteria	0.999	Enterobacteriales	0.9832	Enterobacteriaceae	0.9854	Escherichia/Shigella	0.779	Shigella sonnei	99	NR_074894	0	19	1	2	0	2	0	1	2	3	5	1	1	5	3	0	0	18	2	0	2	0	0	0	3	0	0	0	0	0	0	1	0	0	1	0
OTU49	Actinobacteria	0.9993	Actinobacteria	0.9628	Actinomycetales	0.8742	Mycobacteriaceae	0.3088	Mycobacterium	0.0788	Rhodococcus rhodochrous	93	NR_116689	0	0	0	0	0	0	0	0	0	0	0	0	0	0	0	0	0	0	0	0	0	0	0	0	0	0	1	2	1	0	0	1	1	0	0	0
OTU5	Firmicutes	1	Bacilli	0.9988	Lactobacillales	0.9974	Leuconostocaceae	0.9971	Fructobacillus	0.9798	Fructobacillus fructosus	99	NR_113579	0	8	0	1	0	0	0	0	0	0	0	0	0	0	1	5	5	0	0	17	42	73	3	3	870	2133	2380	1375	16	115	4	31	27	13	75	306
OTU50	Proteobacteria	1	Betaproteobacteria	0.9965	Burkholderiales	0.989	Burkholderiaceae	0.9854	Ralstonia	0.9693	Ralstonia insidiosa	99	NR_025242	0	0	0	0	0	0	0	0	0	0	1	0	0	0	0	0	0	1	1	0	0	0	0	0	0	0	0	0	0	0	0	0	0	0	0	0
OTU53	Proteobacteria	1	Gammaproteobacteria	0.9986	Enterobacteriales	0.9681	Enterobacteriaceae	0.9462	Yersinia	0.7119	Yersinia kristensenii	98	NR_025159	0	2	6	4	158	30	5	6	4	4	158	2	1	48	2	0	1	268	165	0	2	0	5	1	3	0	1	1	0	0	0	0	0	0	1	0
OTU54	Proteobacteria	1	Gammaproteobacteria	0.9994	Enterobacteriales	0.987	Enterobacteriaceae	0.9868	Klebsiella	0.8461	Klebsiella pneumoniae	99	NR_117683	1	6	0	0	1	0	0	10	14	0	1	0	2	9	0	0	3	32	7	0	3	0	2	0	148	0	57	1	0	1	1	0	0	0	0	0
OTU55	Proteobacteria	0.9993	Gammaproteobacteria	0.9959	Orbales	0.9719	Orbaceae	0.9615	Gilliamella	0.779	Gilliamella apicola	98	NR_121727	189	426	3470	604	1541	2095	657	414	2327	854	401	251	1277	789	576	461	645	335	448	428	561	671	399	620	752	553	490	972	448	756	566	241	709	833	458	702
OTU56	Bacteroidetes	0.9993	Bacteroidia	0.9557	Bacteroidales	0.8527	Prevotellaceae	0.5433	Prevotella	0.3294	Prevotella brevis	90	NR_041954	0	0	0	0	0	0	0	0	0	0	0	0	0	0	0	0	0	0	0	1	0	0	0	0	0	0	0	0	0	0	0	0	0	0	0	0
OTU58	Firmicutes	0.9995	Bacilli	0.9969	Bacillales	0.9916	Paenibacillaceae_1	0.9868	Paenibacillus	0.9818	Paenibacillus larvae	98	NR_042947	12	0	11	22	21	3	10	22	17	21	17	19	9	9	11	2	0	6	31	0	0	0	0	0	4	0	0	1	0	0	1	1	0	0	0	0
OTU59	Proteobacteria	1	Alphaproteobacteria	0.9962	Rhizobiales	0.9794	Phyllobacteriaceae	0.9233	Phyllobacterium	0.8126	Phyllobacterium myrsinacearum	99	NR_113874	1	0	7	0	0	3	0	0	0	8	0	3	2	2	0	0	0	6	0	0	0	0	0	0	0	0	0	0	0	0	0	0	0	0	0	0
OTU6	Proteobacteria	0.9993	Betaproteobacteria	0.9628	Neisseriales	0.7373	Neisseriaceae	0.5433	Neisseria	0.2276	Snodgrassella alvi	99	NR_122055	864	3852	1106	967	1220	1136	1628	1017	1299	459	1145	915	1730	1192	663	2271	2424	1304	1092	3117	5719	4050	3493	2650	1755	992	1486	2493	1561	2504	4420	2274	2461	1524	1927	3399
OTU60	Firmicutes	0.9999	Clostridia	0.9919	Clostridiales	0.97	Lachnospiraceae	0.9157	Clostridium_XlVa	0.7454	Bacteroides xylanolyticus	99	NR_104899	0	0	0	0	1	0	0	0	0	0	1	0	0	0	0	0	0	0	532	0	0	0	0	0	0	0	0	0	0	0	0	0	0	0	0	0
OTU61	Firmicutes	1	Bacilli	0.9993	Bacillales	0.9984	Staphylococcaceae	0.9868	Staphylococcus	0.9902	Staphylococcus epidermidis	99	NR_113957	0	0	3	0	5	0	0	0	5	0	2	2	0	0	2	0	0	0	0	0	0	0	0	0	1	0	0	0	0	0	0	0	0	0	0	0
OTU63	Proteobacteria	0.9996	Gammaproteobacteria	0.9971	Enterobacteriales	0.9278	Enterobacteriaceae	0.9004	Tatumella	0.3294	Tatumella morbirosei	96	NR_116282	0	0	0	0	0	0	0	0	0	0	0	0	0	0	0	0	0	0	0	0	0	0	0	0	0	0	0	0	0	0	0	0	1	0	0	1
OTU64	Actinobacteria	1	Actinobacteria	0.9985	Actinomycetales	0.9832	Corynebacteriaceae	0.9462	Corynebacterium	0.9693	Corynebacterium aurimucosum	99	NR_115262	0	0	0	0	0	1	0	0	0	0	0	0	0	0	0	0	0	0	0	0	0	0	0	0	0	0	0	0	0	0	0	0	0	0	0	0
OTU65	Firmicutes	1	Bacilli	0.9994	Lactobacillales	0.9987	Leuconostocaceae	0.9986	Leuconostoc	0.9839	Leuconostoc mesenteroides	99	NR_074957	0	0	0	0	0	0	0	1	0	0	218	0	0	0	0	0	0	29	11	0	0	0	0	0	0	0	0	0	0	0	0	0	0	0	0	0
OTU66	Firmicutes	0.9992	Bacilli	0.9959	Bacillales	0.9832	Staphylococcaceae	0.9462	Staphylococcus	0.9693	Staphylococcus cohnii	97	NR_037046	0	0	0	0	0	0	0	0	0	1	0	0	0	0	2	0	0	0	3	0	0	0	0	0	0	1	0	0	0	0	0	0	0	0	0	1
OTU68	Proteobacteria	1	Gammaproteobacteria	0.9989	Enterobacteriales	0.9775	Enterobacteriaceae	0.9833	Pantoea	0.8126	Pantoea vagans	100	NR_102966	0	0	0	15	15	4	8	1	0	0	6	0	1	3	1	0	6	1	3	0	2	0	1	0	7	0	3	0	0	1	0	0	0	0	3	0
OTU7	Firmicutes	1	Bacilli	0.9968	Lactobacillales	0.989	Lactobacillaceae	0.9882	Lactobacillus	0.9944	Lactobacillus helsingborgensis	99	NR_126253	863	1533	750	1147	395	379	736	417	557	1785	1029	1528	1810	1479	742	1294	1473	1200	460	2190	1898	1630	1536	2014	1078	849	1503	988	1415	1014	1614	1129	1169	1990	1922	1250
OTU72	Proteobacteria	0.9993	Alphaproteobacteria	0.9797	Rhodospirillales	0.9492	Acetobacteraceae	0.9157	Saccharibacter	0.3804	Saccharibacter floricola	95	NR_024819	0	0	0	0	0	11	9	1	18	0	1	1	0	1	2	0	1	4	2	4	7	3	0	0	3	0	0	0	0	1	2	1	2	0	0	0
OTU73	Proteobacteria	0.9999	Gammaproteobacteria	0.9982	Pseudomonadales	0.9738	Pseudomonadaceae	0.9691	Pseudomonas	0.8126	Pseudomonas rhizosphaerae	98	NR_029063	1	0	2	0	0	5	0	0	0	4	1	5	4	5	0	0	0	7	0	0	0	0	0	0	0	0	0	0	0	0	0	0	0	0	0	0
OTU77	Bacteroidetes	0.9993	Bacteroidia	0.9481	Bacteroidales	0.8226	Prevotellaceae	0.3482	Prevotella	0.068	Prevotella ruminicola	91	NR_102887	0	0	0	0	0	0	0	0	0	0	0	0	0	0	0	0	0	0	0	0	0	0	0	0	0	0	0	0	0	0	0	0	0	0	0	0
OTU78	Firmicutes	1	Bacilli	0.9994	Bacillales	0.989	Bacillaceae_1	0.9833	Bacillus	0.9798	Bacillus cereus	99	NR_113266	0	0	0	0	0	1	0	0	0	0	0	1	1	1	2	0	0	0	3	0	0	0	0	0	0	1	0	0	0	0	0	0	0	0	0	0
OTU79	Bacteroidetes	0.9994	Bacteroidia	0.9846	Bacteroidales	0.9643	Prevotellaceae	0.9004	Prevotella	0.7119	Prevotella brevis	90	NR_041954	0	0	0	0	0	0	0	0	0	0	0	0	0	0	0	0	0	0	0	0	0	0	0	0	0	0	0	0	0	0	0	0	0	0	0	0
OTU8	Firmicutes	0.9996	Bacilli	0.9971	Lactobacillales	0.9907	Lactobacillaceae	0.9903	Lactobacillus	0.9944	Lactobacillus mellis	99	NR_126249	194	774	650	305	137	583	247	256	198	753	384	1221	1129	739	307	2188	1564	580	116	1329	624	830	1607	1381	2021	1307	877	1245	853	792	607	762	894	1298	607	1356
OTU80	Proteobacteria	0.9994	Alphaproteobacteria	0.8387	Rickettsiales	0.4388	Anaplasmataceae	0.2695	Anaplasma	0.0148	Wolbachia endosymbiont	90	NR_074571	0	0	0	0	0	0	0	0	0	0	0	0	0	0	0	0	0	0	0	0	0	0	0	0	1	0	0	0	0	0	0	1	0	1	0	1
OTU83	Proteobacteria	0.9994	Alphaproteobacteria	0.9725	Rhizobiales	0.8226	Bartonellaceae	0.4269	Bartonella	0.1766	Paenochrobactrum glaciei	96	NR_112750	3	0	17	4	31	20	45	32	21	27	34	37	6	40	32	3	11	50	63	29	8	4	39	54	31	4	35	4	1	5	48	37	28	26	37	4
OTU84	Proteobacteria	0.9997	Gammaproteobacteria	0.9976	Enterobacteriales	0.9385	Enterobacteriaceae	0.908	Providencia	0.4823	Moellerella wisconsensis	99	NR_104939	0	0	0	0	0	0	1	0	0	0	0	0	0	0	0	0	0	0	0	0	0	0	0	0	0	0	0	0	0	0	0	0	0	0	0	8
OTU86	Bacteroidetes	0.9993	Bacteroidia	0.9652	Bacteroidales	0.8849	Prevotellaceae	0.5046	Prevotella	0.2785	Prevotella ruminicola	92	NR_102887	0	0	0	0	0	0	0	0	0	0	0	0	0	0	0	0	0	0	0	0	0	0	0	0	0	0	0	0	0	0	0	0	0	0	0	0
OTU87	Actinobacteria	1	Actinobacteria	0.9985	Actinomycetales	0.9794	Corynebacteriaceae	0.9233	Corynebacterium	0.8797	Corynebacterium mucifaciens	98	NR_026396	0	0	0	0	0	0	0	0	1	0	0	0	0	0	0	0	0	0	1	0	0	0	0	0	0	0	0	0	0	0	0	0	0	0	0	0
OTU88	Proteobacteria	0.9994	Alphaproteobacteria	0.9628	Rhodospirillales	0.8742	Acetobacteraceae	0.7755	Gluconobacter	0.0897	Commensalibacter intestini	98	NR_116307	0	0	0	0	0	0	0	0	0	5	0	0	0	23	0	0	0	1	0	0	0	0	0	0	0	0	0	0	0	0	0	0	0	0	0	0
OTU89	Bacteroidetes	0.9994	Bacteroidia	0.9822	Bacteroidales	0.9599	Porphyromonadaceae	0.9157	Dysgonomonas	0.7119	Dysgonomonas gadei	96	NR_113134	0	0	0	0	0	0	0	0	2	0	0	0	0	0	0	0	0	0	35	0	0	0	0	0	0	0	0	0	0	0	0	0	0	0	0	0
OTU9	Firmicutes	0.9997	Bacilli	0.9975	Lactobacillales	0.9916	Lactobacillaceae	0.991	Lactobacillus	0.9956	Lactobacillus kunkeei	99	NR_026404	2	216	1	0	0	9	0	0	0	1	5	2	1	1	3	5	5	7	1	8	4	8	16	5	87	1710	63	6	1	4	7	1	7	4	3	8
OTU90	Proteobacteria	1	Alphaproteobacteria	0.9964	Rhodospirillales	0.9899	Acetobacteraceae	0.9896	Tanticharoenia	0.8461	Tanticharoenia sakaeratensis	99	NR_041601	0	0	2	0	0	0	0	0	4	0	1	0	0	2	1	0	0	6	4	0	0	0	0	0	0	0	0	0	0	0	0	0	0	0	0	0
OTU91	Proteobacteria	1	Alphaproteobacteria	0.9966	Sphingomonadales	0.9851	Sphingomonadaceae	0.9854	Sphingomonas	0.9818	Sphingomonas yabuuchiae	99	NR_028634	0	0	0	0	0	0	0	0	0	0	0	0	0	0	0	0	0	0	1	0	0	0	0	0	0	0	0	0	0	0	0	0	0	0	0	0
OTU94	Proteobacteria	1	Gammaproteobacteria	0.9961	Pseudomonadales	0.9832	Moraxellaceae	0.9847	Acinetobacter	0.9818	Acinetobacter radioresistens	99	NR_114074	0	0	1	4	10	4	6	0	2	0	8	0	0	0	0	0	0	1	0	0	0	0	0	0	0	0	0	0	0	0	0	0	0	0	0	0
OTU96	Proteobacteria	1	Gammaproteobacteria	0.9992	Pseudomonadales	0.9886	Pseudomonadaceae	0.9875	Pseudomonas	0.9735	Pseudomonas agarici	99	NR_036998	4	0	6	0	1	4	0	0	0	7	1	5	2	5	0	0	0	6	2	0	0	0	0	0	0	0	0	0	0	0	0	0	0	0	0	0
OTU97	Firmicutes	0.9994	Clostridia	0.9481	Clostridiales	0.8226	Lachnospiraceae	0.6207	Clostridium_XlVa	0.3804	Butyrivibrio fibrisolvens	89	NR_025981	0	0	0	0	0	0	0	0	0	0	0	0	0	0	0	0	0	0	0	0	0	0	0	0	0	0	0	0	0	0	0	0	0	0	0	0
OTU98	Bacteroidetes	0.9993	Bacteroidia	0.9406	Bacteroidales	0.7373	Porphyromonadaceae	0.4269	Dysgonomonas	0.0571	Dysgonomonas capnocytophagoides	90	NR_113133	0	0	0	0	0	0	0	0	0	0	0	0	0	0	0	0	0	0	11	0	0	0	0	0	0	0	0	0	0	0	0	0	0	0	0	0
[truncated: 13 more columns]

## Sheet: Table S3 - VIFs
Table S3 Variance inflation factors (VIFs).
Legend: JD - Julian Days; lat - latitude; lon - longitude
VIFs
EFB1	2.54
EFB2	10.6
EFBPCR1	6.69
JD	3.91
lat	2.76
lon	2.56

## Sheet: Desc_HID
1	41	2	38	3	39
0.975932	44	2	40	2.97593	40
1.02407	44	2	41	3.02407	40
0.975932	45	1.97593	44	3	41
1.02407	45	2.02407	44	3.04814	41
1	46			2.95186	41
0.975932	48			3	43
1.02407	48			3.04814	43
1	49			2.95186	43
0.975932	50			3.09627	43
1.02407	50			2.90373	43
1	51			2.97593	44
0.975932	52			3.02407	44
1.02407	52			2.92779	44
1	53			3.07221	44
0.975932	54			2.97593	45
1.02407	54			3.02407	45
1	56			2.97593	47
1	59			3.02407	47
				3	48
				2.97593	51
				3.02407	51
				3	52
				3	55
				3	56

## Sheet: Desc_HID1
0.8	41	1.8	38	2.8	39
1.2	41	2.2	38	3.2	39
0.8	44	1.8	40	2.8	40
1.2	44	2.2	40	3.2	40
0.8	44	1.8	41	2.8	40
1.2	44	2.2	41	3.2	40
0.8	45	1.8	44	2.8	41
1.2	45	2.2	44	3.2	41
0.8	45	1.8	44	2.8	41
1.2	45	2.2	44	3.2	41
0.8	46			2.8	41
1.2	46			3.2	41
0.8	48			2.8	43
1.2	48			3.2	43
0.8	48			2.8	43
1.2	48			3.2	43
0.8	49			2.8	43
1.2	49			3.2	43
0.8	50			2.8	43
1.2	50			3.2	43
0.8	50			2.8	43
1.2	50			3.2	43
0.8	51			2.8	44
1.2	51			3.2	44
0.8	52			2.8	44
1.2	52			3.2	44
0.8	52			2.8	44
1.2	52			3.2	44
0.8	53			2.8	44
1.2	53			3.2	44
0.8	54			2.8	45
1.2	54			3.2	45
0.8	54			2.8	45
1.2	54			3.2	45
0.8	56			2.8	47
1.2	56			3.2	47
0.8	59			2.8	47
1.2	59			3.2	47
				2.8	48
				3.2	48
				2.8	51
				3.2	51
				2.8	51
				3.2	51
				2.8	52
				3.2	52
				2.8	55
				3.2	55
				2.8	56
				3.2	56

## Sheet: Uni_HID
0.975932	0	2	3	3	13
1.02407	0	2	5	3.04814	13
0.927795	0	1.97593	8	2.95186	14
1.07221	0	2.02407	8	3.09627	27
0.879658	0	2	12	2.90373	37
1.12034	0			3.14441	38
0.831521	0			2.85559	40
1.16848	0			3	47
0.783384	0			3	83
1.21662	0			3	139
0.908896	0			2.97593	153
1.12638	0			3.02407	168
0.776448	0			3	257
1.11993	0			3	310
1.14467	0			3	421
1.09616	0			3	573
1	13			3	633
1	14			3	655
1	15			3	707
				3	913
				3	1113
				3	1229
				3	1514
				3	1919
				3	2018

## Sheet: Uni_HID1
0.8	0	1.8	3	2.8	13
1.2	0	2.2	3	3.2	13
0.8	0	1.8	5	2.8	13
1.2	0	2.2	5	3.2	13
0.8	0	1.8	8	2.8	14
1.2	0	2.2	8	3.2	14
0.8	0	1.8	8	2.8	27
1.2	0	2.2	8	3.2	27
0.8	0	1.8	12	2.8	37
1.2	0	2.2	12	3.2	37
0.8	0			2.8	38
1.2	0			3.2	38
0.8	0			2.8	40
1.2	0			3.2	40
0.8	0			2.8	47
1.2	0			3.2	47
0.8	0			2.8	83
1.2	0			3.2	83
0.8	0			2.8	139
1.2	0			3.2	139
0.8	0			2.8	153
1.2	0			3.2	153
0.8	0			2.8	168
1.2	0			3.2	168
0.8	0			2.8	257
1.2	0			3.2	257
0.8	0			2.8	310
1.2	0			3.2	310
0.8	0			2.8	421
1.2	0			3.2	421
0.8	0			2.8	573
1.2	0			3.2	573
0.8	13			2.8	633
1.2	13			3.2	633
0.8	14			2.8	655
1.2	14			3.2	655
0.8	15			2.8	707
1.2	15			3.2	707
				2.8	913
				3.2	913
				2.8	1113
				3.2	1113
				2.8	1229
				3.2	1229
				2.8	1514
				3.2	1514
				2.8	1919
				3.2	1919
				2.8	2018
				3.2	2018

## Sheet: Desc_HID2
0.976075	-6	2	0.477121	3	1.11394
1.02392	-6	2	0.69897	3.04785	1.11394
0.928226	-6	1.97608	0.90309	2.95215	1.14613
1.07177	-6	2.02392	0.90309	3	1.43136
0.880377	-6	2	1.07918	2.97608	1.5682
1.11962	-6			3.02392	1.57978
0.832528	-6			3	1.60206
1.16747	-6			3	1.6721
0.784678	-6			3	1.91908
1.21532	-6			3	2.14301
1.1668	-6			3	2.18469
1.13362	-6			3	2.22531
0.941827	-6			3	2.40993
1.2125	-6			3	2.49136
1.17087	-6			3	2.62428
0.795869	-6			3	2.75815
1	1.11394			2.97608	2.8014
1.04785	1.14613			3.02392	2.81624
0.952151	1.17609			3	2.84942
				3	2.96047
				3	3.0465
				3	3.08955
				3	3.18013
				2.97608	3.28307
				3.02392	3.30492

## Sheet: Desc_HID3
0.8	-6	1.8	0.477121	2.8	1.11394
1.2	-6	2.2	0.477121	3.2	1.11394
0.8	-6	1.8	0.69897	2.8	1.11394
1.2	-6	2.2	0.69897	3.2	1.11394
0.8	-6	1.8	0.90309	2.8	1.14613
1.2	-6	2.2	0.90309	3.2	1.14613
0.8	-6	1.8	0.90309	2.8	1.43136
1.2	-6	2.2	0.90309	3.2	1.43136
0.8	-6	1.8	1.07918	2.8	1.5682
1.2	-6	2.2	1.07918	3.2	1.5682
0.8	-6			2.8	1.57978
1.2	-6			3.2	1.57978
0.8	-6			2.8	1.60206
1.2	-6			3.2	1.60206
0.8	-6			2.8	1.6721
1.2	-6			3.2	1.6721
0.8	-6			2.8	1.91908
1.2	-6			3.2	1.91908
0.8	-6			2.8	2.14301
1.2	-6			3.2	2.14301
0.8	-6			2.8	2.18469
1.2	-6			3.2	2.18469
0.8	-6			2.8	2.22531
1.2	-6			3.2	2.22531
0.8	-6			2.8	2.40993
1.2	-6			3.2	2.40993
0.8	-6			2.8	2.49136
1.2	-6			3.2	2.49136
0.8	-6			2.8	2.62428
1.2	-6			3.2	2.62428
0.8	-6			2.8	2.75815
1.2	-6			3.2	2.75815
0.8	1.11394			2.8	2.8014
1.2	1.11394			3.2	2.8014
0.8	1.14613			2.8	2.81624
1.2	1.14613			3.2	2.81624
0.8	1.17609			2.8	2.84942
1.2	1.17609			3.2	2.84942
				2.8	2.96047
				3.2	2.96047
				2.8	3.0465
				3.2	3.0465
				2.8	3.08955
				3.2	3.08955
				2.8	3.18013
				3.2	3.18013
				2.8	3.28307
				3.2	3.28307
				2.8	3.30492
				3.2	3.30492
